# Supplementary material for: Facilitating hydroxide transport in anion exchange membranes via hydrophilic grafts
Source: Royal Society of Chemistry journal article supplement (doi:10.1039/c4ta02942a), 2014-01-01
Supplement: c4ta02942a1.pdf [file c4ta02942a1.pdf]

## Supplementary Information for Facilitating Hydroxide Transport in Anion Exchange Membranes via Hydrophilic Grafts

Steve S. He and Curtis W. Frank\*

Department of Chemical Engineering, Stanford University, Stanford, California 94305-5025, United States

### Teubner-Strey Fitting

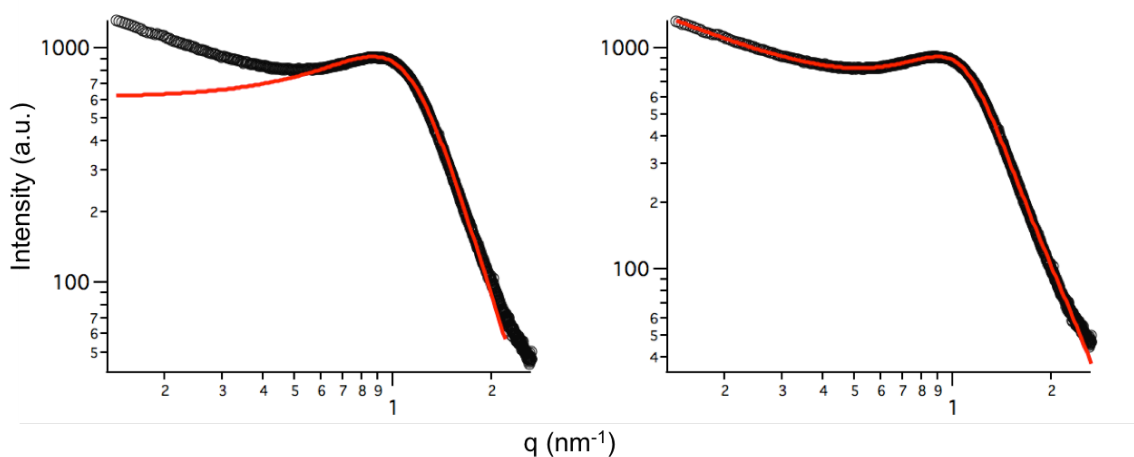

**Figure S1 Teubner Strey (TS) Fitting of SAXS data.** (Left) Example of QA PSf-g-PEG350 SAXS profile fit to the TS model. (Right) Example of QA PSf-g-PEG350 SAXS profile fit to the TS model, but also including power law scaling for the “matrix knee”.
